# Supplementary material for: Partial molar isentropic and isothermal compressibilities of some N-acetyl amino acid amides in aqueous solution at 298.15 K
Source: Royal Society of Chemistry journal article supplement (doi:10.1039/b316358j), 2004-01-01
Supplement: b316358j.pdf [file b316358j.pdf]

**Table S1** Sound speeds and apparent molar isentropic compressibilities for the *N*-acetyl amino acid amides in aqueous solution at 298.15 K

| $m/\text{mol kg}^{-1}$ | $u/\text{m s}^{-1}$ | $10^{15} K_{s,\phi}/\text{m}^3 \text{ mol}^{-1} \text{ Pa}^{-1}$ | $m/\text{mol kg}^{-1}$ | $u/\text{m s}^{-1}$ | $10^{15} K_{s,\phi}/\text{m}^3 \text{ mol}^{-1} \text{ Pa}^{-1}$ |
|------------------------|---------------------|------------------------------------------------------------------|------------------------|---------------------|------------------------------------------------------------------|
| AcglyNH <sub>2</sub>   |                     |                                                                  |                        |                     |                                                                  |
| 0.199536               | 1506.746            | -0.948 (0.015) <sup>a</sup>                                      | 0.097586               | 1501.662            | -1.256 (0.031) <sup>a</sup>                                      |
| 0.180484               | 1505.809            | -1.020 (0.017)                                                   | 0.080125               | 1500.785            | -1.348 (0.037)                                                   |
| 0.158288               | 1504.710            | -1.099 (0.019)                                                   | 0.060293               | 1499.779            | -1.423 (0.050)                                                   |
| 0.140436               | 1503.814            | -1.131 (0.021)                                                   | 0.040964               | 1498.787            | -1.403 (0.073)                                                   |
| 0.118767               | 1502.729            | -1.198 (0.025)                                                   |                        |                     |                                                                  |
| AcalaNH <sub>2</sub>   |                     |                                                                  |                        |                     |                                                                  |
| 0.178835               | 1508.057            | 0.045 (0.017)                                                    | 0.100116               | 1503.113            | -0.262 (0.030)                                                   |
| 0.161163               | 1506.949            | 0.000 (0.019)                                                    | 0.079665               | 1501.812            | -0.334 (0.038)                                                   |
| 0.142252               | 1505.766            | -0.076 (0.021)                                                   | 0.060603               | 1500.601            | -0.471 (0.049)                                                   |
| 0.120579               | 1504.408            | -0.185 (0.025)                                                   | 0.040029               | 1499.277            | -0.525 (0.075)                                                   |
| AcvalNH <sub>2</sub>   |                     |                                                                  |                        |                     |                                                                  |
| 0.158026               | 1510.545            | 0.395 (0.019)                                                    | 0.084325               | 1504.170            | -0.068 (0.035)                                                   |
| 0.146068               | 1509.520            | 0.324 (0.020)                                                    | 0.068201               | 1502.759            | -0.206 (0.044)                                                   |
| 0.134501               | 1508.533            | 0.220 (0.022)                                                    | 0.055535               | 1501.641            | -0.282 (0.054)                                                   |
| 0.116566               | 1506.978            | 0.133 (0.026)                                                    | 0.041115               | 1500.371            | -0.486 (0.073)                                                   |
| 0.099951               | 1505.546            | -0.039 (0.030)                                                   |                        |                     |                                                                  |
| AcleuNH <sub>2</sub>   |                     |                                                                  |                        |                     |                                                                  |
| 0.158402               | 1513.007            | 0.110 (0.019)                                                    | 0.085493               | 1505.667            | -0.861 (0.035)                                                   |
| 0.145264               | 1511.709            | -0.077 (0.020)                                                   | 0.069540               | 1504.013            | -0.997 (0.043)                                                   |
| 0.130184               | 1510.203            | -0.275 (0.023)                                                   | 0.054190               | 1502.426            | -1.281 (0.0550)                                                  |
| 0.114752               | 1508.646            | -0.462 (0.026)                                                   | 0.040826               | 1501.021            | -1.389 (0.073)                                                   |
| 0.100622               | 1507.203            | -0.593 (0.030)                                                   |                        |                     |                                                                  |

AcileNH<sub>2</sub>

|          |          |                           |          |          |                           |
|----------|----------|---------------------------|----------|----------|---------------------------|
| 0.012032 | 1497.954 | -2.83 <sub>7</sub> (0.25) | 0.010068 | 1497.749 | -2.93 <sub>0</sub> (0.30) |
| 0.011497 | 1497.896 | -2.74 <sub>6</sub> (0.26) | 0.008930 | 1497.631 | -3.05 <sub>6</sub> (0.34) |
| 0.011077 | 1497.856 | -2.96 <sub>9</sub> (0.27) | 0.008088 | 1497.542 | -3.05 <sub>0</sub> (0.37) |
| 0.010540 | 1497.797 | -2.83 <sub>2</sub> (0.28) |          |          |                           |

AcasnNH<sub>2</sub>

|          |          |                |          |          |                           |
|----------|----------|----------------|----------|----------|---------------------------|
| 0.069627 | 1501.318 | -5.267 (0.043) | 0.043568 | 1499.598 | -5.457 (0.069)            |
| 0.064043 | 1500.952 | -5.319 (0.047) | 0.039961 | 1499.361 | -5.518 (0.075)            |
| 0.058120 | 1500.558 | -5.326 (0.052) | 0.034027 | 1498.961 | -5.468 (0.088)            |
| 0.052025 | 1500.157 | -5.385 (0.058) | 0.027869 | 1498.555 | -5.58 <sub>7</sub> (0.11) |
| 0.046161 | 1499.762 | -5.337 (0.065) |          |          |                           |

AcglnNH<sub>2</sub>

|          |          |                |          |          |                |
|----------|----------|----------------|----------|----------|----------------|
| 0.096104 | 1503.907 | -2.110 (0.031) | 0.065265 | 1501.616 | -2.293 (0.046) |
| 0.090150 | 1503.469 | -2.162 (0.033) | 0.056415 | 1500.944 | -2.239 (0.053) |
| 0.083351 | 1502.960 | -2.168 (0.036) | 0.050944 | 1500.537 | -2.300 (0.059) |
| 0.075334 | 1502.360 | -2.181 (0.040) | 0.041186 | 1499.812 | -2.460 (0.073) |

ActyrNH<sub>2</sub>

|          |          |                          |          |          |                          |
|----------|----------|--------------------------|----------|----------|--------------------------|
| 0.019509 | 1498.298 | 5.80 <sub>0</sub> (0.15) | 0.016423 | 1498.048 | 5.65 <sub>3</sub> (0.18) |
| 0.018918 | 1498.249 | 5.81 <sub>2</sub> (0.16) | 0.015991 | 1498.004 | 5.96 <sub>5</sub> (0.19) |
| 0.018534 | 1498.225 | 5.56 <sub>6</sub> (0.16) | 0.014967 | 1497.921 | 5.92 <sub>2</sub> (0.20) |
| 0.018083 | 1498.179 | 5.85 <sub>5</sub> (0.17) | 0.014085 | 1497.855 | 5.64 <sub>5</sub> (0.21) |
| 0.016992 | 1498.097 | 5.58 <sub>2</sub> (0.18) | 0.012978 | 1497.762 | 5.71 <sub>2</sub> (0.23) |
| 0.016968 | 1498.096 | 5.54 <sub>8</sub> (0.18) | 0.012912 | 1497.760 | 5.55 <sub>2</sub> (0.23) |

<sup>a</sup> Estimated uncertainties are in parentheses.

---

**Table S2** Sound speeds and apparent molar isentropic compressibilities for the *N*-acetyl-*N'*-methyl amino acid amides in aqueous solution at 298.15 K

| $m/\text{mol kg}^{-1}$ | $u/\text{m s}^{-1}$ | $10^{15} K_{s,\phi}/\text{m}^3 \text{ mol}^{-1} \text{ Pa}^{-1}$ | $m/\text{mol kg}^{-1}$ | $u/\text{m s}^{-1}$ | $10^{15} K_{s,\phi}/\text{m}^3 \text{ mol}^{-1} \text{ Pa}^{-1}$ |
|------------------------|---------------------|------------------------------------------------------------------|------------------------|---------------------|------------------------------------------------------------------|
| AcglyNHMe              |                     |                                                                  |                        |                     |                                                                  |
| 0.159001               | 1506.577            | 1.752 (0.019) <sup>a</sup>                                       | 0.084874               | 1502.016            | 1.530 (0.030) <sup>a</sup>                                       |
| 0.144637               | 1505.704            | 1.692 (0.020)                                                    | 0.069616               | 1501.064            | 1.505 (0.043)                                                    |
| 0.127142               | 1504.625            | 1.667 (0.023)                                                    | 0.055697               | 1500.198            | 1.432 (0.054)                                                    |
| 0.113829               | 1503.809            | 1.611 (0.026)                                                    | 0.041726               | 1499.323            | 1.377 (0.072)                                                    |
| 0.097866               | 1502.82             | 1.579 (0.031)                                                    |                        |                     |                                                                  |

AcalaNHMe

|          |          |               |          |          |               |
|----------|----------|---------------|----------|----------|---------------|
| 0.153826 | 1508.213 | 2.927 (0.019) | 0.082519 | 1502.916 | 2.793 (0.036) |
| 0.137043 | 1506.970 | 2.910 (0.022) | 0.074020 | 1502.286 | 2.724 (0.040) |
| 0.124211 | 1506.021 | 2.879 (0.024) | 0.068223 | 1501.855 | 2.675 (0.044) |
| 0.111937 | 1505.113 | 2.837 (0.027) | 0.054403 | 1500.810 | 2.694 (0.055) |
| 0.097040 | 1504.008 | 2.777 (0.031) | 0.039910 | 1499.717 | 2.656 (0.075) |

AcvalNHMe

|          |          |               |          |          |               |
|----------|----------|---------------|----------|----------|---------------|
| 0.144860 | 1509.851 | 2.235 (0.021) | 0.084847 | 1504.480 | 1.870 (0.035) |
| 0.128595 | 1508.404 | 2.149 (0.023) | 0.068521 | 1502.996 | 1.794 (0.044) |
| 0.115000 | 1507.194 | 2.049 (0.026) | 0.055106 | 1501.769 | 1.755 (0.054) |
| 0.100190 | 1505.865 | 1.959 (0.030) | 0.041794 | 1500.554 | 1.623 (0.072) |

AcleuNHMe

|          |          |               |          |          |               |
|----------|----------|---------------|----------|----------|---------------|
| 0.141073 | 1512.849 | 2.862 (0.021) | 0.082573 | 1506.285 | 2.224 (0.036) |
| 0.130262 | 1511.651 | 2.743 (0.023) | 0.068038 | 1504.634 | 1.976 (0.044) |
| 0.119324 | 1510.430 | 2.632 (0.025) | 0.056128 | 1503.260 | 1.867 (0.053) |
| 0.107719 | 1509.122 | 2.545 (0.028) | 0.041291 | 1501.544 | 1.649 (0.072) |
| 0.093283 | 1507.506 | 2.311 (0.032) |          |          |               |

<sup>a</sup> Estimated uncertainties are in parentheses.

---
